# Supplementary material
Source: Springer Nature journal article supplement (https://www.springermedizin.de/resource/supplementary/12891_2013_1942_MOESM2_ESM.pdf/9508842)

A

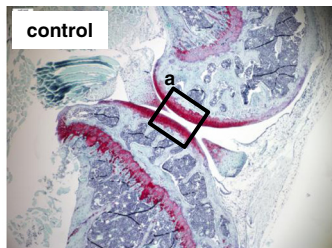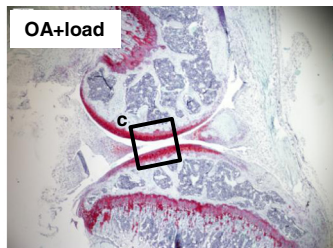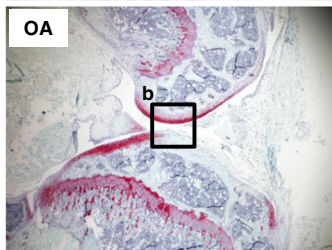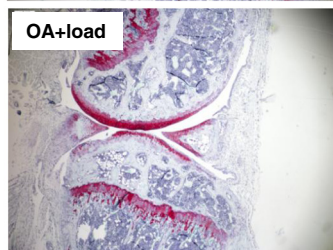

B

**control****OA****OA+load**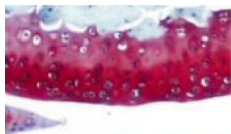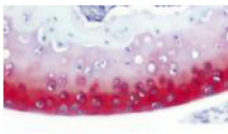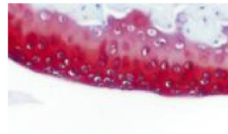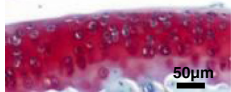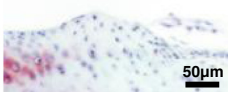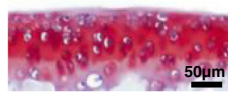

Supplement: MOESM2 [file 9508842]
